# Supplementary material for: First-principles investigation of the lattice vibrations in the alkali feldspar solid solution
Source: PubMed Central journal article supplement (PMC4509561; doi:10.1007/s00269-014-0715-8), 2014-10-11
Supplement: 269_2014_715_MOESM1_ESM.pdf [file 269_2014_715_MOESM1_ESM.pdf]

Appendix A:  
 Structural details of all investigated cells of the study  
 "First-principles investigation of the lattice vibrations in the alkali feldspar solid solution"  
 published by Artur Benisek, Edgar Dachs, Michael Grodzicki in Physics and Chemistry  
 of Minerals.

Ab100, Low albite

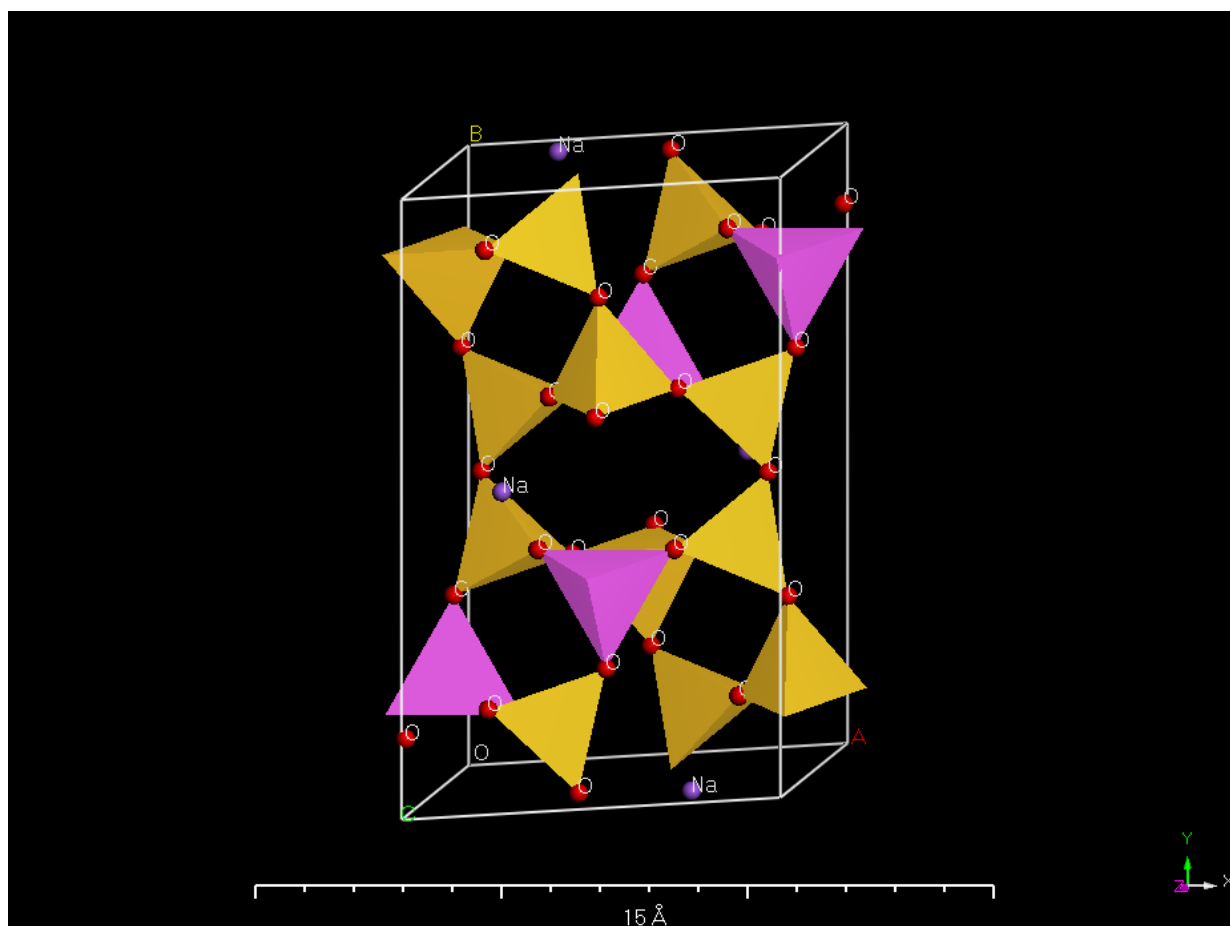

(Al-tetrahedron: magenta, Si-tetrahedron: yellow)

Number of symmetry operations = 4  
 Point group of crystal = 2: Ci, -1, -1

| Lattice parameters(A) |           | Cell Angles |            |
|-----------------------|-----------|-------------|------------|
| a =                   | 7.995950  | alpha =     | 94.186669  |
| b =                   | 12.619333 | beta =      | 117.039304 |
| c =                   | 7.062478  | gamma =     | 88.108769  |

Current cell volume = 633.041346 A\*\*3

BFGS: Final Enthalpy = -1.99962241E+004 eV

| x | Element | Atom   | Fractional coordinates of atoms |          |          | x |
|---|---------|--------|---------------------------------|----------|----------|---|
| x |         | Number | u                               | v        | w        | x |
| x | O       | 1      | 0.005608                        | 0.127522 | 0.970426 | x |
| x | O       | 2      | 0.582265                        | 0.995995 | 0.275644 | x |



Ab75Or25

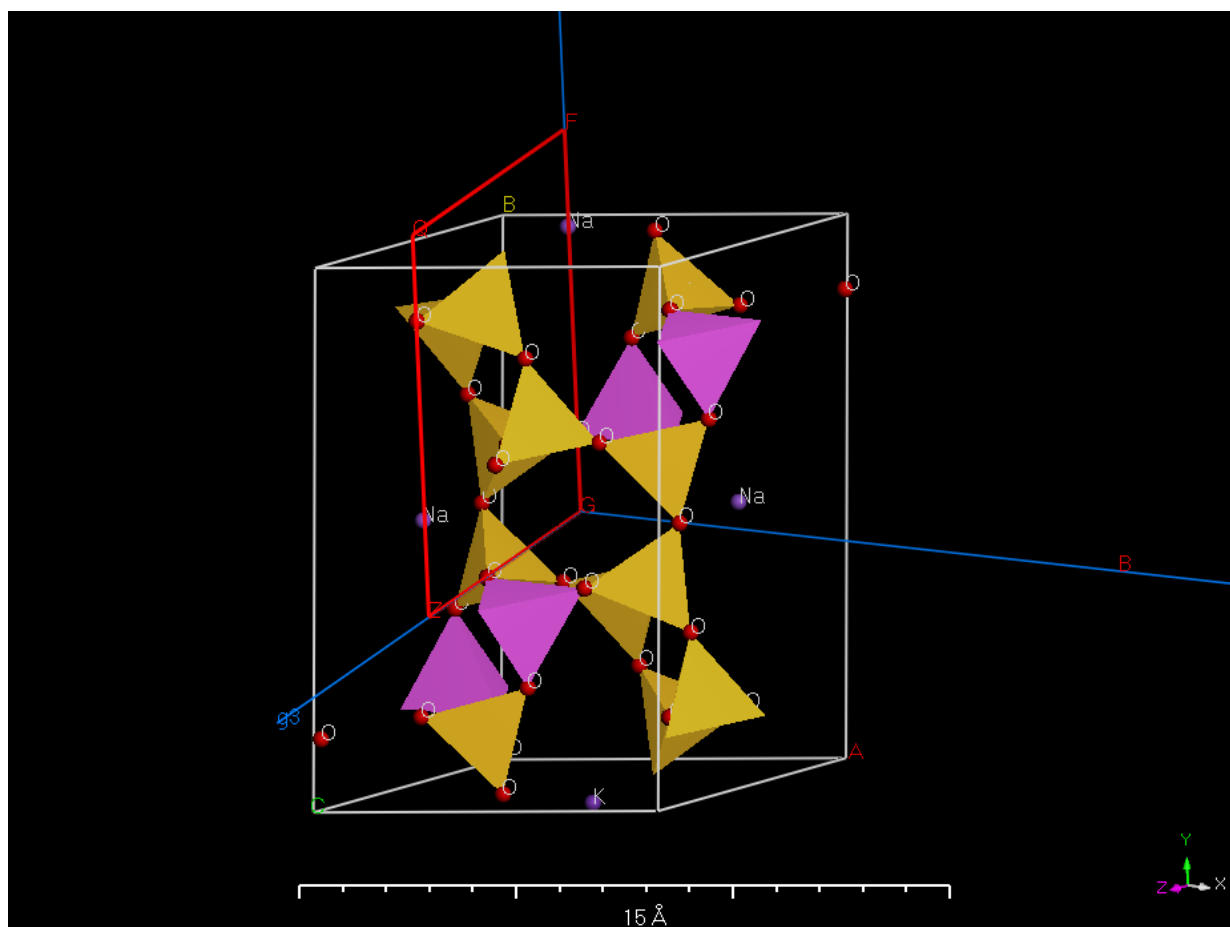

There are no symmetry operations specified or generated for this cell

|                       |           |             |            |
|-----------------------|-----------|-------------|------------|
| Lattice parameters(A) |           | Cell Angles |            |
| a =                   | 8.113125  | alpha =     | 93.741534  |
| b =                   | 12.679461 | beta =      | 116.647441 |
| c =                   | 7.081416  | gamma =     | 88.022166  |

Current cell volume = 649.691356      A\*\*3

BFGS: Final Enthalpy      = -1.96263049E+004 eV

| x | Element | Atom   | Fractional coordinates of atoms |          |          | x |
|---|---------|--------|---------------------------------|----------|----------|---|
| x |         | Number | u                               | v        | w        | x |
| x | -----   | -----  | -----                           | -----    | -----    | x |
| x | O       | 1      | 0.011279                        | 0.132478 | 0.983025 | x |
| x | O       | 2      | 0.593538                        | 0.996578 | 0.281651 | x |
| x | O       | 3      | 0.826617                        | 0.114598 | 0.219052 | x |
| x | O       | 4      | 0.811049                        | 0.853850 | 0.226376 | x |
| x | O       | 5      | 0.012761                        | 0.303216 | 0.274110 | x |
| x | O       | 6      | 0.023265                        | 0.692643 | 0.228614 | x |
| x | O       | 7      | 0.211892                        | 0.113986 | 0.390078 | x |
| x | O       | 8      | 0.176721                        | 0.869798 | 0.430560 | x |
| x | O       | 9      | 0.505443                        | 0.633114 | 0.966187 | x |
| x | O       | 10     | 0.092095                        | 0.497769 | 0.278296 | x |
| x | O       | 11     | 0.313895                        | 0.611824 | 0.185969 | x |
| x | O       | 12     | 0.321169                        | 0.350300 | 0.263909 | x |
| x | O       | 13     | 0.517258                        | 0.798958 | 0.263892 | x |



Ab50Or50, cell 1

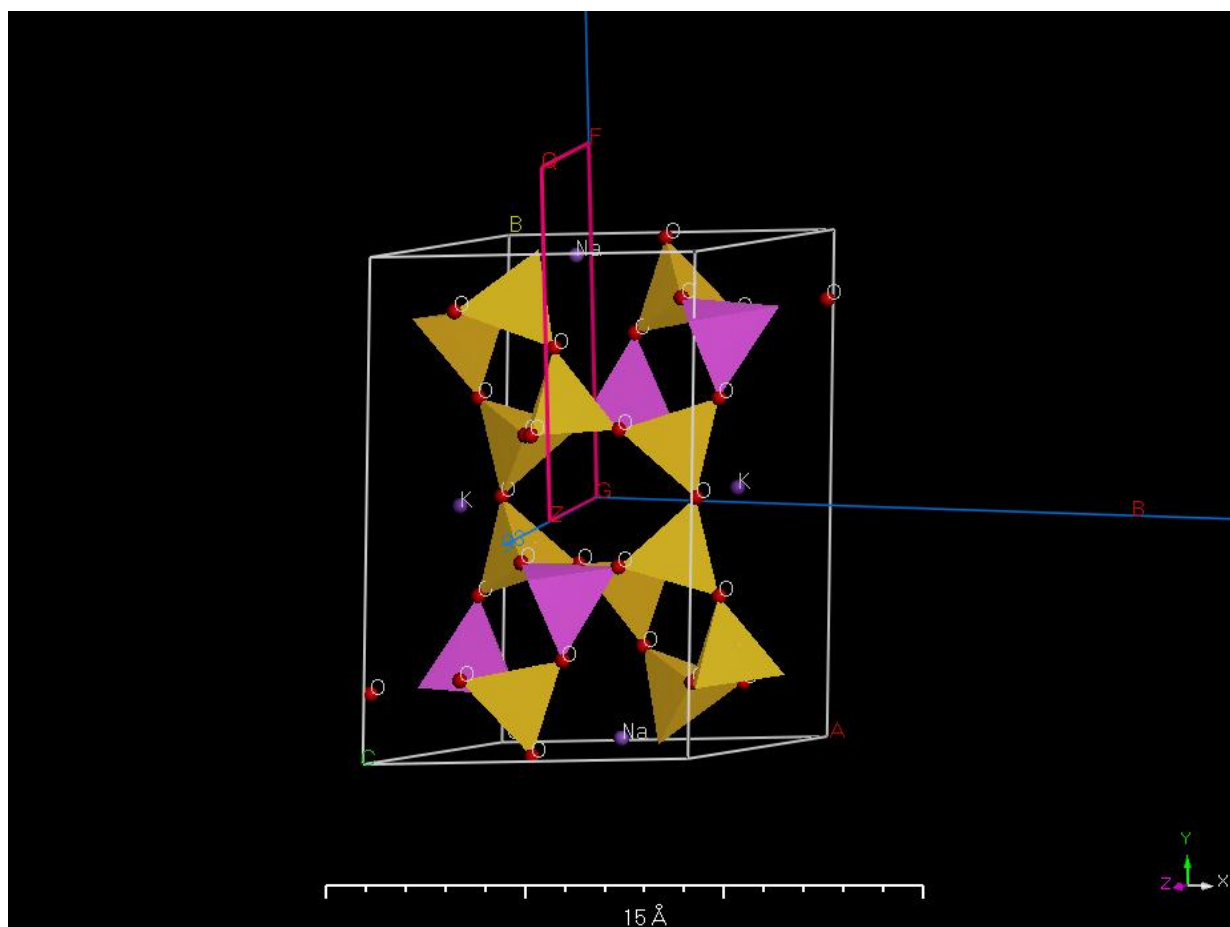

There are no symmetry operations specified or generated for this cell

| Lattice parameters(A) |           | Cell Angles |            |
|-----------------------|-----------|-------------|------------|
| a =                   | 8.186195  | alpha =     | 93.201511  |
| b =                   | 12.750190 | beta =      | 115.705142 |
| c =                   | 7.095594  | gamma =     | 88.082983  |

Current cell volume = 666.238082 A\*\*3

BFGS: Final Enthalpy = -1.92566312E+004 eV

| x | Element | Atom   | Fractional coordinates of atoms |          |          | x |
|---|---------|--------|---------------------------------|----------|----------|---|
| x |         | Number | u                               | v        | w        | x |
| x | O       | 1      | 0.001840                        | 0.137059 | 0.958910 | x |
| x | O       | 2      | 0.603771                        | 1.001019 | 0.287524 | x |
| x | O       | 3      | 0.819141                        | 0.117391 | 0.188015 | x |
| x | O       | 4      | 0.820037                        | 0.848576 | 0.268809 | x |
| x | O       | 5      | 0.030762                        | 0.299139 | 0.256184 | x |
| x | O       | 6      | 0.019865                        | 0.689855 | 0.254416 | x |
| x | O       | 7      | 0.201581                        | 0.104690 | 0.376480 | x |
| x | O       | 8      | 0.178465                        | 0.866012 | 0.437375 | x |
| x | O       | 9      | 0.497362                        | 0.642761 | 0.990901 | x |
| x | O       | 10     | 0.111572                        | 0.496071 | 0.290605 | x |
| x | O       | 11     | 0.316226                        | 0.628319 | 0.220500 | x |
| x | O       | 12     | 0.330074                        | 0.358475 | 0.238094 | x |
| x | O       | 13     | 0.512597                        | 0.813342 | 0.285551 | x |



Ab50Or50, cell 2

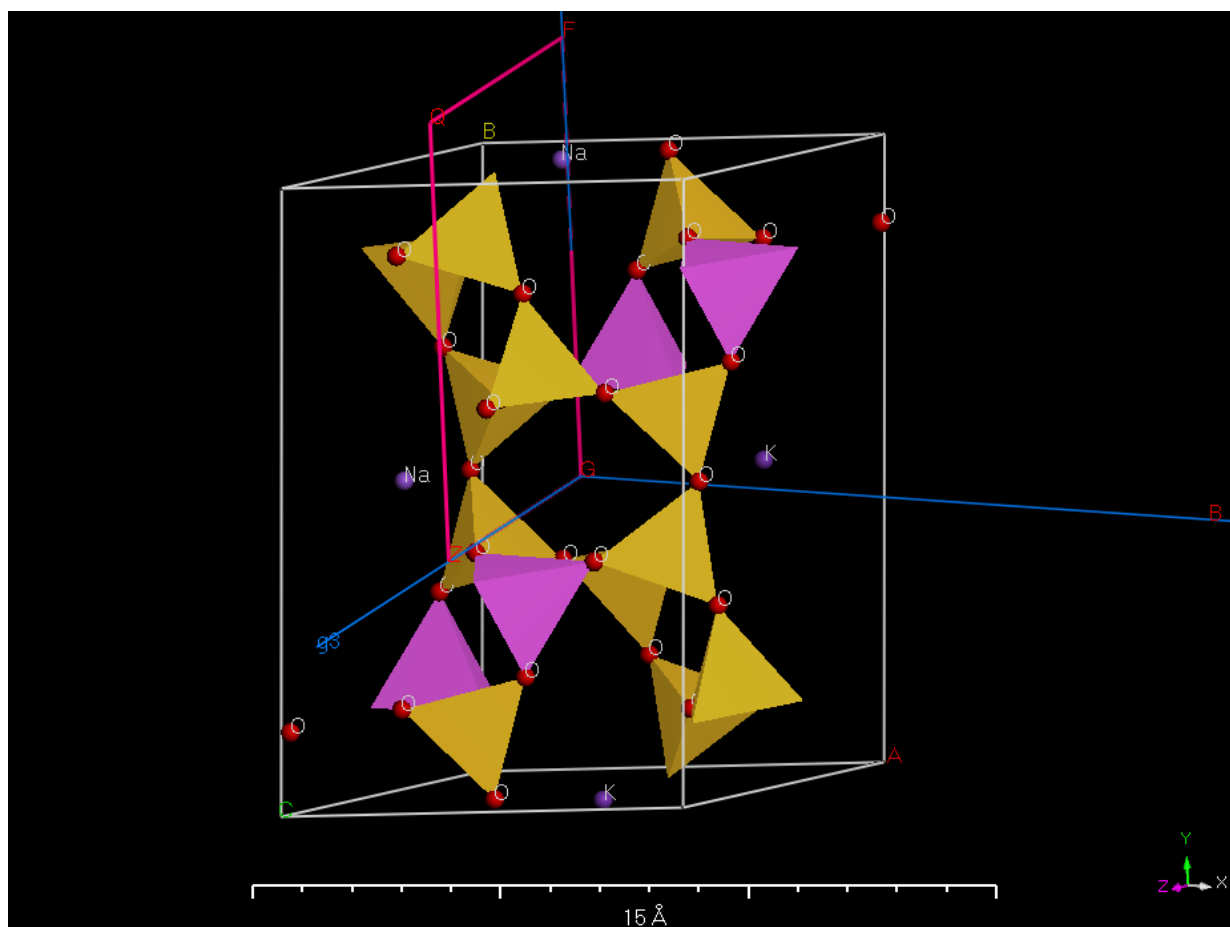

There are no symmetry operations specified or generated for this cell

| Lattice parameters(A) |           | Cell Angles |            |
|-----------------------|-----------|-------------|------------|
| a =                   | 8.214162  | alpha =     | 92.860659  |
| b =                   | 12.737500 | beta =      | 116.380025 |
| c =                   | 7.100450  | gamma =     | 87.821991  |

Current cell volume = 664.610560 A\*\*3

BFGS: Final Enthalpy = -1.92565566E+004 eV

| x | Element | Atom   | Fractional coordinates of atoms |          |          | x |
|---|---------|--------|---------------------------------|----------|----------|---|
| x |         | Number | u                               | v        | w        | x |
| x | O       | 1      | 0.012077                        | 0.132142 | 0.979892 | x |
| x | O       | 2      | 0.603475                        | 0.999933 | 0.283285 | x |
| x | O       | 3      | 0.831886                        | 0.119535 | 0.219265 | x |
| x | O       | 4      | 0.812398                        | 0.852983 | 0.231173 | x |
| x | O       | 5      | 0.023632                        | 0.303849 | 0.261248 | x |
| x | O       | 6      | 0.026059                        | 0.692694 | 0.249767 | x |
| x | O       | 7      | 0.211246                        | 0.111955 | 0.388304 | x |
| x | O       | 8      | 0.173592                        | 0.871702 | 0.428016 | x |
| x | O       | 9      | 0.496864                        | 0.639865 | 0.975206 | x |
| x | O       | 10     | 0.110184                        | 0.498395 | 0.281216 | x |
| x | O       | 11     | 0.309467                        | 0.624435 | 0.190334 | x |
| x | O       | 12     | 0.335803                        | 0.352018 | 0.270928 | x |
| x | O       | 13     | 0.514298                        | 0.809160 | 0.263415 | x |





Ab50Or50, cell 3 (supercell)

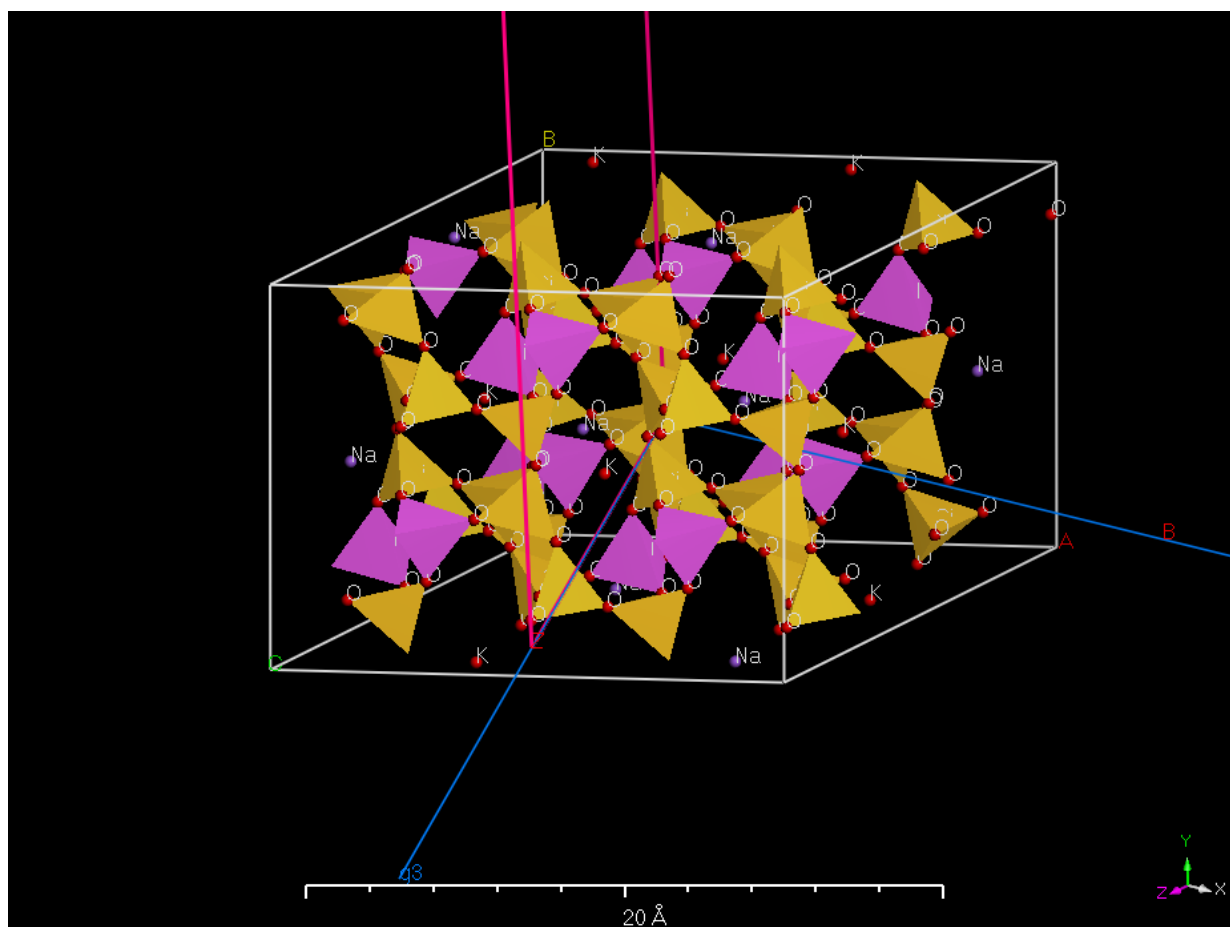

There are no symmetry operations specified or generated for this cell

| Lattice parameters(A) |           | Cell Angles |            |
|-----------------------|-----------|-------------|------------|
| a =                   | 16.390620 | alpha =     | 92.233188  |
| b =                   | 12.755275 | beta =      | 116.358277 |
| c =                   | 14.214170 | gamma =     | 87.864763  |

Current cell volume = 2660.075315 A\*\*3

BFGS: Final Enthalpy = -7.70262867E+004 eV

| x | Element | Atom   | Fractional coordinates of atoms |          |          | x |
|---|---------|--------|---------------------------------|----------|----------|---|
| x |         | Number | u                               | v        | w        | x |
| x | O       | 1      | 0.003519                        | 0.137991 | 0.491099 | x |
| x | O       | 2      | 0.304668                        | 1.001586 | 0.138725 | x |
| x | O       | 3      | 0.408605                        | 0.134138 | 0.105829 | x |
| x | O       | 4      | 0.409232                        | 0.855494 | 0.119640 | x |
| x | O       | 5      | 0.005675                        | 0.309971 | 0.128592 | x |
| x | O       | 6      | 0.016025                        | 0.698148 | 0.124929 | x |
| x | O       | 7      | 0.099846                        | 0.123396 | 0.200987 | x |
| x | O       | 8      | 0.093674                        | 0.875554 | 0.209565 | x |
| x | O       | 9      | 0.255183                        | 0.637078 | 0.491375 | x |
| x | O       | 10     | 0.048865                        | 0.501890 | 0.144721 | x |
| x | O       | 11     | 0.158275                        | 0.620539 | 0.102101 | x |
| x | O       | 12     | 0.157554                        | 0.358973 | 0.120497 | x |
| x | O       | 13     | 0.257738                        | 0.808487 | 0.128025 | x |

|   |   |    |           |          |          |   |
|---|---|----|-----------|----------|----------|---|
| x | 0 | 14 | 0.260498  | 0.196010 | 0.124865 | x |
| x | 0 | 15 | 0.349407  | 0.620505 | 0.198470 | x |
| x | 0 | 16 | 0.338952  | 0.372475 | 0.211907 | x |
| x | 0 | 17 | 0.500467  | 0.859442 | 0.010104 | x |
| x | 0 | 18 | 0.202218  | 0.000941 | 0.357034 | x |
| x | 0 | 19 | 0.094192  | 0.876106 | 0.396638 | x |
| x | 0 | 20 | 0.096821  | 0.146664 | 0.384287 | x |
| x | 0 | 21 | 0.491823  | 0.694858 | 0.369828 | x |
| x | 0 | 22 | 0.483994  | 0.303067 | 0.378416 | x |
| x | 0 | 23 | 0.398438  | 0.884556 | 0.300289 | x |
| x | 0 | 24 | 0.405324  | 0.126829 | 0.290716 | x |
| x | 0 | 25 | 0.246460  | 0.362812 | 0.009904 | x |
| x | 0 | 26 | 0.452214  | 0.499853 | 0.354808 | x |
| x | 0 | 27 | 0.341925  | 0.384819 | 0.399160 | x |
| x | 0 | 28 | 0.342115  | 0.641079 | 0.379043 | x |
| x | 0 | 29 | 0.246327  | 0.193930 | 0.370854 | x |
| x | 0 | 30 | 0.238519  | 0.803979 | 0.374754 | x |
| x | 0 | 31 | 0.150469  | 0.379567 | 0.300935 | x |
| x | 0 | 32 | 0.161314  | 0.626627 | 0.289752 | x |
| x | 0 | 33 | 0.501105  | 0.131359 | 0.490292 | x |
| x | 0 | 34 | 0.807715  | 1.001300 | 0.149757 | x |
| x | 0 | 35 | 0.908632  | 0.122261 | 0.099284 | x |
| x | 0 | 36 | 0.914336  | 0.857848 | 0.127473 | x |
| x | 0 | 37 | 0.510335  | 0.313201 | 0.125920 | x |
| x | 0 | 38 | 0.511112  | 0.692929 | 0.121916 | x |
| x | 0 | 39 | 0.598126  | 0.122231 | 0.197081 | x |
| x | 0 | 40 | 0.588767  | 0.868832 | 0.211934 | x |
| x | 0 | 41 | 0.745527  | 0.636520 | 0.488127 | x |
| x | 0 | 42 | 0.557679  | 0.502075 | 0.138034 | x |
| x | 0 | 43 | 0.661564  | 0.632337 | 0.105364 | x |
| x | 0 | 44 | 0.666029  | 0.357184 | 0.123842 | x |
| x | 0 | 45 | 0.761974  | 0.809487 | 0.131251 | x |
| x | 0 | 46 | 0.766796  | 0.194451 | 0.126397 | x |
| x | 0 | 47 | 0.852118  | 0.617204 | 0.200838 | x |
| x | 0 | 48 | 0.846634  | 0.371523 | 0.211114 | x |
| x | 0 | 49 | 0.993198  | 0.865884 | 0.007534 | x |
| x | 0 | 50 | 0.693222  | 0.000313 | 0.353686 | x |
| x | 0 | 51 | 0.589460  | 0.880077 | 0.399543 | x |
| x | 0 | 52 | 0.585563  | 0.143531 | 0.375135 | x |
| x | 0 | 53 | 0.992363  | 0.690729 | 0.374810 | x |
| x | 0 | 54 | 0.991063  | 0.307387 | 0.380330 | x |
| x | 0 | 55 | 0.903301  | 0.879393 | 0.305844 | x |
| x | 0 | 56 | 0.916616  | 0.131199 | 0.289699 | x |
| x | 0 | 57 | 0.754617  | 0.360743 | 0.011379 | x |
| x | 0 | 58 | 0.943915  | 0.500068 | 0.362581 | x |
| x | 0 | 59 | 0.839785  | 0.368587 | 0.394164 | x |
| x | 0 | 60 | 0.837294  | 0.646461 | 0.378715 | x |
| x | 0 | 61 | 0.738543  | 0.192044 | 0.371433 | x |
| x | 0 | 62 | 0.734726  | 0.806759 | 0.379060 | x |
| x | 0 | 63 | 0.649717  | 0.385762 | 0.300523 | x |
| x | 0 | 64 | 0.656778  | 0.629942 | 0.289141 | x |
| x | 0 | 65 | -0.001382 | 0.139095 | 0.988498 | x |
| x | 0 | 66 | 0.299774  | 1.000443 | 0.645597 | x |
| x | 0 | 67 | 0.409812  | 0.116220 | 0.601977 | x |
| x | 0 | 68 | 0.412919  | 0.860743 | 0.625487 | x |
| x | 0 | 69 | 0.013614  | 0.306958 | 0.632523 | x |
| x | 0 | 70 | 0.010400  | 0.694121 | 0.621281 | x |
| x | 0 | 71 | 0.099996  | 0.110773 | 0.695044 | x |
| x | 0 | 72 | 0.091016  | 0.868865 | 0.711427 | x |
| x | 0 | 73 | 0.248071  | 0.635296 | 0.988924 | x |

|   |    |     |          |           |          |   |
|---|----|-----|----------|-----------|----------|---|
| x | O  | 74  | 0.055675 | 0.500554  | 0.639828 | x |
| x | O  | 75  | 0.160817 | 0.629597  | 0.606277 | x |
| x | O  | 76  | 0.165585 | 0.357031  | 0.626098 | x |
| x | O  | 77  | 0.260814 | 0.807396  | 0.630799 | x |
| x | O  | 78  | 0.265731 | 0.195535  | 0.622019 | x |
| x | O  | 79  | 0.350836 | 0.613067  | 0.697686 | x |
| x | O  | 80  | 0.345336 | 0.371672  | 0.709788 | x |
| x | O  | 81  | 0.496868 | 0.865927  | 0.509911 | x |
| x | O  | 82  | 0.193674 | -0.002648 | 0.859149 | x |
| x | O  | 83  | 0.086501 | 0.873094  | 0.894889 | x |
| x | O  | 84  | 0.079932 | 0.137074  | 0.868816 | x |
| x | O  | 85  | 0.489747 | 0.688410  | 0.871029 | x |
| x | O  | 86  | 0.490281 | 0.305021  | 0.875341 | x |
| x | O  | 87  | 0.401796 | 0.880354  | 0.803297 | x |
| x | O  | 88  | 0.410878 | 0.128682  | 0.788283 | x |
| x | O  | 89  | 0.251510 | 0.364674  | 0.510632 | x |
| x | O  | 90  | 0.443576 | 0.497578  | 0.862049 | x |
| x | O  | 91  | 0.340244 | 0.363815  | 0.893659 | x |
| x | O  | 92  | 0.334833 | 0.642831  | 0.874138 | x |
| x | O  | 93  | 0.234372 | 0.190588  | 0.869900 | x |
| x | O  | 94  | 0.235612 | 0.804703  | 0.879109 | x |
| x | O  | 95  | 0.151061 | 0.387570  | 0.803736 | x |
| x | O  | 96  | 0.154322 | 0.629788  | 0.789557 | x |
| x | O  | 97  | 0.501589 | 0.140148  | 0.989454 | x |
| x | O  | 98  | 0.796978 | 1.001827  | 0.635484 | x |
| x | O  | 99  | 0.910541 | 0.128176  | 0.608976 | x |
| x | O  | 100 | 0.909305 | 0.858880  | 0.620001 | x |
| x | O  | 101 | 0.508867 | 0.301992  | 0.631476 | x |
| x | O  | 102 | 0.513531 | 0.697239  | 0.626005 | x |
| x | O  | 103 | 0.602007 | 0.111939  | 0.698942 | x |
| x | O  | 104 | 0.594534 | 0.873914  | 0.708896 | x |
| x | O  | 105 | 0.755644 | 0.635261  | 0.992669 | x |
| x | O  | 106 | 0.546418 | 0.499030  | 0.644606 | x |
| x | O  | 107 | 0.656246 | 0.620543  | 0.603831 | x |
| x | O  | 108 | 0.656469 | 0.359847  | 0.619402 | x |
| x | O  | 109 | 0.755792 | 0.808374  | 0.625982 | x |
| x | O  | 110 | 0.760268 | 0.198468  | 0.620306 | x |
| x | O  | 111 | 0.847105 | 0.619960  | 0.696744 | x |
| x | O  | 112 | 0.837041 | 0.375442  | 0.707735 | x |
| x | O  | 113 | 1.004060 | 0.863471  | 0.513104 | x |
| x | O  | 114 | 0.702518 | -0.003481 | 0.861051 | x |
| x | O  | 115 | 0.591905 | 0.869914  | 0.892984 | x |
| x | O  | 116 | 0.591654 | 0.139832  | 0.878589 | x |
| x | O  | 117 | 0.987863 | 0.693869  | 0.869015 | x |
| x | O  | 118 | 0.983639 | 0.302738  | 0.869409 | x |
| x | O  | 119 | 0.895745 | 0.885816  | 0.798080 | x |
| x | O  | 120 | 0.899793 | 0.126176  | 0.789292 | x |
| x | O  | 121 | 0.742814 | 0.366788  | 0.506398 | x |
| x | O  | 122 | 0.951105 | 0.498726  | 0.853004 | x |
| x | O  | 123 | 0.842629 | 0.377882  | 0.896387 | x |
| x | O  | 124 | 0.838486 | 0.634638  | 0.876406 | x |
| x | O  | 125 | 0.743419 | 0.190038  | 0.870344 | x |
| x | O  | 126 | 0.738233 | 0.799864  | 0.873619 | x |
| x | O  | 127 | 0.651330 | 0.378304  | 0.801189 | x |
| x | O  | 128 | 0.657785 | 0.623617  | 0.790877 | x |
| x | Na | 1   | 0.366845 | 0.017935  | 0.425660 | x |
| x | Na | 2   | 0.885713 | 0.479111  | 0.074864 | x |
| x | Na | 3   | 0.616986 | 0.514224  | 0.424334 | x |
| x | Na | 4   | 0.136262 | 0.979788  | 0.581312 | x |
| x | Na | 5   | 0.381863 | 0.487004  | 0.573463 | x |

|   |    |    |          |          |          |   |
|---|----|----|----------|----------|----------|---|
| x | Na | 6  | 0.115763 | 0.517309 | 0.923585 | x |
| x | Na | 7  | 0.632624 | 0.978994 | 0.573743 | x |
| x | Na | 8  | 0.864753 | 0.023080 | 0.925351 | x |
| x | Al | 1  | 0.003603 | 0.178242 | 0.106684 | x |
| x | Al | 2  | 0.252449 | 0.676399 | 0.106496 | x |
| x | Al | 3  | 0.493802 | 0.826391 | 0.392861 | x |
| x | Al | 4  | 0.248441 | 0.325804 | 0.393268 | x |
| x | Al | 5  | 0.503477 | 0.181723 | 0.105434 | x |
| x | Al | 6  | 0.758325 | 0.678095 | 0.108582 | x |
| x | Al | 7  | 1.000513 | 0.822603 | 0.395917 | x |
| x | Al | 8  | 0.743129 | 0.323603 | 0.391961 | x |
| x | Al | 9  | 0.005617 | 0.175749 | 0.608027 | x |
| x | Al | 10 | 0.256830 | 0.676106 | 0.607824 | x |
| x | Al | 11 | 0.497376 | 0.819941 | 0.892923 | x |
| x | Al | 12 | 0.243285 | 0.321696 | 0.893233 | x |
| x | Al | 13 | 0.505410 | 0.170305 | 0.608184 | x |
| x | Al | 14 | 0.749724 | 0.676125 | 0.605944 | x |
| x | Al | 15 | 0.989874 | 0.825411 | 0.890638 | x |
| x | Al | 16 | 0.748550 | 0.322087 | 0.892450 | x |
| x | Si | 1  | 0.003942 | 0.823797 | 0.116174 | x |
| x | Si | 2  | 0.348023 | 0.116903 | 0.164452 | x |
| x | Si | 3  | 0.343400 | 0.882909 | 0.175534 | x |
| x | Si | 4  | 0.250156 | 0.322375 | 0.115946 | x |
| x | Si | 5  | 0.098962 | 0.613614 | 0.164340 | x |
| x | Si | 6  | 0.092044 | 0.383301 | 0.177099 | x |
| x | Si | 7  | 0.495069 | 0.177097 | 0.384954 | x |
| x | Si | 8  | 0.154236 | 0.887468 | 0.335659 | x |
| x | Si | 9  | 0.160021 | 0.120258 | 0.324887 | x |
| x | Si | 10 | 0.250032 | 0.678010 | 0.384678 | x |
| x | Si | 11 | 0.401585 | 0.388541 | 0.336987 | x |
| x | Si | 12 | 0.407829 | 0.618302 | 0.322419 | x |
| x | Si | 13 | 0.501545 | 0.818870 | 0.114664 | x |
| x | Si | 14 | 0.853276 | 0.114094 | 0.165694 | x |
| x | Si | 15 | 0.847900 | 0.882631 | 0.181824 | x |
| x | Si | 16 | 0.757488 | 0.320160 | 0.117042 | x |
| x | Si | 17 | 0.600429 | 0.617023 | 0.163196 | x |
| x | Si | 18 | 0.597306 | 0.384746 | 0.175786 | x |
| x | Si | 19 | 1.003376 | 0.181046 | 0.387878 | x |
| x | Si | 20 | 0.648166 | 0.887003 | 0.336878 | x |
| x | Si | 21 | 0.652654 | 0.118762 | 0.321219 | x |
| x | Si | 22 | 0.744853 | 0.680723 | 0.384798 | x |
| x | Si | 23 | 0.902099 | 0.384288 | 0.337571 | x |
| x | Si | 24 | 0.905331 | 0.618493 | 0.325597 | x |
| x | Si | 25 | 0.001804 | 0.820566 | 0.615351 | x |
| x | Si | 26 | 0.349466 | 0.111999 | 0.663201 | x |
| x | Si | 27 | 0.345137 | 0.883045 | 0.679253 | x |
| x | Si | 28 | 0.255802 | 0.321274 | 0.615917 | x |
| x | Si | 29 | 0.098650 | 0.615844 | 0.663384 | x |
| x | Si | 30 | 0.097401 | 0.383531 | 0.678880 | x |
| x | Si | 31 | 0.499551 | 0.178850 | 0.883730 | x |
| x | Si | 32 | 0.148291 | 0.883611 | 0.837049 | x |
| x | Si | 33 | 0.151182 | 0.113762 | 0.819975 | x |
| x | Si | 34 | 0.244547 | 0.678641 | 0.883980 | x |
| x | Si | 35 | 0.401352 | 0.381988 | 0.836016 | x |
| x | Si | 36 | 0.403850 | 0.614941 | 0.822631 | x |
| x | Si | 37 | 0.503366 | 0.823316 | 0.616647 | x |
| x | Si | 38 | 0.844781 | 0.115677 | 0.662227 | x |
| x | Si | 39 | 0.840591 | 0.884095 | 0.673305 | x |
| x | Si | 40 | 0.748294 | 0.324476 | 0.612716 | x |
| x | Si | 41 | 0.596192 | 0.611547 | 0.665108 | x |



Ab50Or50, cell 4 (supercell)

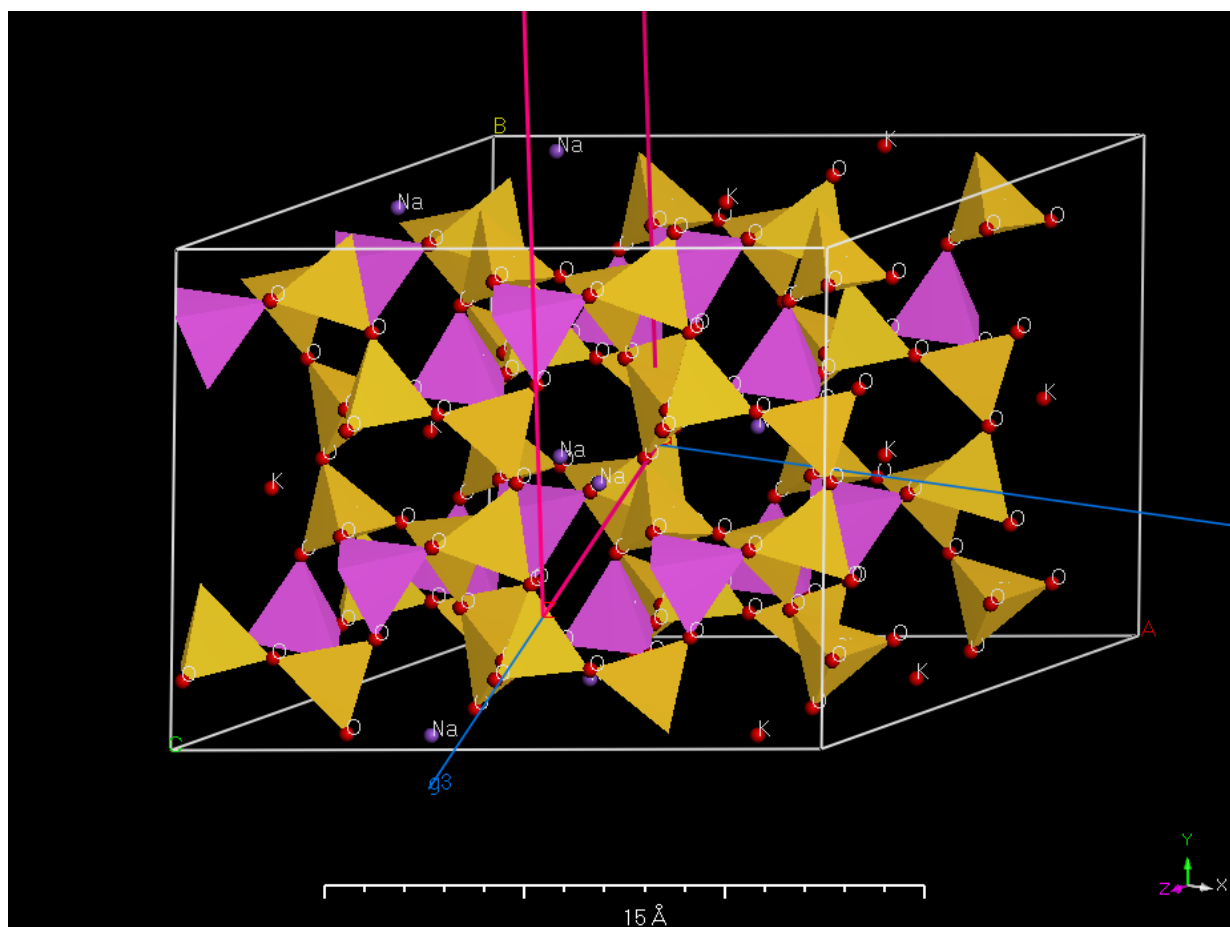

There are no symmetry operations specified or generated for this cell

| Lattice parameters(A) |           | Cell Angles |            |
|-----------------------|-----------|-------------|------------|
| a =                   | 16.378729 | alpha =     | 92.576806  |
| b =                   | 12.735641 | beta =      | 116.619905 |
| c =                   | 14.213852 | gamma =     | 87.815985  |

Current cell volume = 2647.417439 A\*\*3

BFGS: Final Enthalpy = -7.70266251E+004 eV

| x | Element | Atom Number | Fractional coordinates of atoms |          |          | x |
|---|---------|-------------|---------------------------------|----------|----------|---|
| x |         |             | u                               | v        | w        | x |
| x | O       | 1           | 0.012208                        | 0.135271 | 0.491170 | x |
| x | O       | 2           | 0.291840                        | 1.000203 | 0.140233 | x |
| x | O       | 3           | 0.399652                        | 0.119066 | 0.097367 | x |
| x | O       | 4           | 0.408898                        | 0.860120 | 0.128275 | x |
| x | O       | 5           | 0.017480                        | 0.306422 | 0.130172 | x |
| x | O       | 6           | 0.018792                        | 0.695753 | 0.120734 | x |
| x | O       | 7           | 0.108564                        | 0.112590 | 0.197414 | x |
| x | O       | 8           | 0.097230                        | 0.872442 | 0.213578 | x |
| x | O       | 9           | 0.260157                        | 0.634347 | 0.491598 | x |
| x | O       | 10          | 0.056575                        | 0.501501 | 0.146573 | x |
| x | O       | 11          | 0.166205                        | 0.618837 | 0.106597 | x |
| x | O       | 12          | 0.163408                        | 0.367018 | 0.114939 | x |
| x | O       | 13          | 0.258225                        | 0.802955 | 0.131804 | x |

|   |   |    |          |           |          |   |
|---|---|----|----------|-----------|----------|---|
| x | 0 | 14 | 0.259512 | 0.198477  | 0.122736 | x |
| x | 0 | 15 | 0.356886 | 0.611313  | 0.196016 | x |
| x | 0 | 16 | 0.345077 | 0.372732  | 0.213992 | x |
| x | 0 | 17 | 0.489843 | 0.865653  | 0.008403 | x |
| x | 0 | 18 | 0.203432 | 0.000605  | 0.363474 | x |
| x | 0 | 19 | 0.095859 | 0.873618  | 0.398563 | x |
| x | 0 | 20 | 0.092421 | 0.153825  | 0.370672 | x |
| x | 0 | 21 | 0.491774 | 0.697046  | 0.368195 | x |
| x | 0 | 22 | 0.490489 | 0.301523  | 0.377263 | x |
| x | 0 | 23 | 0.393114 | 0.888688  | 0.303984 | x |
| x | 0 | 24 | 0.404924 | 0.127269  | 0.286007 | x |
| x | 0 | 25 | 0.258741 | 0.363703  | 0.012089 | x |
| x | 0 | 26 | 0.458160 | 0.499798  | 0.359766 | x |
| x | 0 | 27 | 0.350347 | 0.380934  | 0.402631 | x |
| x | 0 | 28 | 0.341102 | 0.639880  | 0.371725 | x |
| x | 0 | 29 | 0.249566 | 0.191682  | 0.370856 | x |
| x | 0 | 30 | 0.243821 | 0.805150  | 0.381324 | x |
| x | 0 | 31 | 0.160773 | 0.380333  | 0.300349 | x |
| x | 0 | 32 | 0.160935 | 0.632040  | 0.291026 | x |
| x | 0 | 33 | 0.491258 | 0.136297  | 0.487911 | x |
| x | 0 | 34 | 0.810206 | 1.000411  | 0.140935 | x |
| x | 0 | 35 | 0.916678 | 0.128023  | 0.105679 | x |
| x | 0 | 36 | 0.915214 | 0.854588  | 0.120264 | x |
| x | 0 | 37 | 0.500434 | 0.308318  | 0.129144 | x |
| x | 0 | 38 | 0.506179 | 0.694849  | 0.118677 | x |
| x | 0 | 39 | 0.589226 | 0.119666  | 0.199651 | x |
| x | 0 | 40 | 0.589065 | 0.867960  | 0.208974 | x |
| x | 0 | 41 | 0.743984 | 0.633672  | 0.487977 | x |
| x | 0 | 42 | 0.546567 | 0.499395  | 0.136526 | x |
| x | 0 | 43 | 0.654141 | 0.626382  | 0.101438 | x |
| x | 0 | 44 | 0.657579 | 0.346176  | 0.129328 | x |
| x | 0 | 45 | 0.760295 | 0.809862  | 0.125489 | x |
| x | 0 | 46 | 0.765927 | 0.192882  | 0.121195 | x |
| x | 0 | 47 | 0.845488 | 0.621153  | 0.200392 | x |
| x | 0 | 48 | 0.837361 | 0.371096  | 0.210015 | x |
| x | 0 | 49 | 1.006018 | 0.866328  | 0.012023 | x |
| x | 0 | 50 | 0.693426 | -0.001502 | 0.353427 | x |
| x | 0 | 51 | 0.583795 | 0.881163  | 0.393403 | x |
| x | 0 | 52 | 0.586594 | 0.132982  | 0.385063 | x |
| x | 0 | 53 | 0.989705 | 0.690138  | 0.374511 | x |
| x | 0 | 54 | 0.984073 | 0.307118  | 0.378804 | x |
| x | 0 | 55 | 0.904513 | 0.878846  | 0.299607 | x |
| x | 0 | 56 | 0.912639 | 0.128904  | 0.289985 | x |
| x | 0 | 57 | 0.737792 | 0.364729  | 0.008829 | x |
| x | 0 | 58 | 0.939794 | 0.499589  | 0.359064 | x |
| x | 0 | 59 | 0.833321 | 0.371977  | 0.394321 | x |
| x | 0 | 60 | 0.834786 | 0.645412  | 0.379734 | x |
| x | 0 | 61 | 0.732520 | 0.193577  | 0.369827 | x |
| x | 0 | 62 | 0.731208 | 0.804247  | 0.379266 | x |
| x | 0 | 63 | 0.641436 | 0.387409  | 0.302586 | x |
| x | 0 | 64 | 0.652771 | 0.627558  | 0.286422 | x |
| x | 0 | 65 | 0.012208 | 0.135270  | 0.991170 | x |
| x | 0 | 66 | 0.291839 | 1.000202  | 0.640234 | x |
| x | 0 | 67 | 0.399652 | 0.119066  | 0.597367 | x |
| x | 0 | 68 | 0.408899 | 0.860120  | 0.628276 | x |
| x | 0 | 69 | 0.017480 | 0.306423  | 0.630173 | x |
| x | 0 | 70 | 0.018792 | 0.695753  | 0.620733 | x |
| x | 0 | 71 | 0.108564 | 0.112591  | 0.697414 | x |
| x | 0 | 72 | 0.097230 | 0.872443  | 0.713577 | x |
| x | 0 | 73 | 0.260157 | 0.634348  | 0.991598 | x |

|   |    |     |          |           |          |   |
|---|----|-----|----------|-----------|----------|---|
| x | O  | 74  | 0.056574 | 0.501502  | 0.646572 | x |
| x | O  | 75  | 0.166205 | 0.618837  | 0.606598 | x |
| x | O  | 76  | 0.163407 | 0.367018  | 0.614937 | x |
| x | O  | 77  | 0.258226 | 0.802954  | 0.631805 | x |
| x | O  | 78  | 0.259511 | 0.198477  | 0.622737 | x |
| x | O  | 79  | 0.356886 | 0.611312  | 0.696016 | x |
| x | O  | 80  | 0.345076 | 0.372731  | 0.713993 | x |
| x | O  | 81  | 0.489843 | 0.865653  | 0.508403 | x |
| x | O  | 82  | 0.203433 | 0.000605  | 0.863474 | x |
| x | O  | 83  | 0.095858 | 0.873619  | 0.898561 | x |
| x | O  | 84  | 0.092421 | 0.153824  | 0.870672 | x |
| x | O  | 85  | 0.491774 | 0.697045  | 0.868196 | x |
| x | O  | 86  | 0.490489 | 0.301522  | 0.877264 | x |
| x | O  | 87  | 0.393114 | 0.888688  | 0.803984 | x |
| x | O  | 88  | 0.404924 | 0.127268  | 0.786007 | x |
| x | O  | 89  | 0.258743 | 0.363702  | 0.512089 | x |
| x | O  | 90  | 0.458161 | 0.499798  | 0.859767 | x |
| x | O  | 91  | 0.350348 | 0.380934  | 0.902633 | x |
| x | O  | 92  | 0.341101 | 0.639879  | 0.871724 | x |
| x | O  | 93  | 0.249566 | 0.191683  | 0.870856 | x |
| x | O  | 94  | 0.243820 | 0.805151  | 0.881322 | x |
| x | O  | 95  | 0.160774 | 0.380335  | 0.800349 | x |
| x | O  | 96  | 0.160934 | 0.632040  | 0.791026 | x |
| x | O  | 97  | 0.491259 | 0.136297  | 0.987911 | x |
| x | O  | 98  | 0.810206 | 1.000411  | 0.640935 | x |
| x | O  | 99  | 0.916679 | 0.128023  | 0.605679 | x |
| x | O  | 100 | 0.915214 | 0.854588  | 0.620266 | x |
| x | O  | 101 | 0.500434 | 0.308318  | 0.629144 | x |
| x | O  | 102 | 0.506180 | 0.694849  | 0.618677 | x |
| x | O  | 103 | 0.589226 | 0.119666  | 0.699651 | x |
| x | O  | 104 | 0.589065 | 0.867959  | 0.708974 | x |
| x | O  | 105 | 0.743983 | 0.633671  | 0.987977 | x |
| x | O  | 106 | 0.546568 | 0.499395  | 0.636526 | x |
| x | O  | 107 | 0.654141 | 0.626381  | 0.601436 | x |
| x | O  | 108 | 0.657579 | 0.346176  | 0.629328 | x |
| x | O  | 109 | 0.760294 | 0.809862  | 0.625489 | x |
| x | O  | 110 | 0.765927 | 0.192882  | 0.621195 | x |
| x | O  | 111 | 0.845487 | 0.621153  | 0.700393 | x |
| x | O  | 112 | 0.837362 | 0.371096  | 0.710016 | x |
| x | O  | 113 | 1.006015 | 0.866329  | 0.512022 | x |
| x | O  | 114 | 0.693425 | -0.001502 | 0.853427 | x |
| x | O  | 115 | 0.583795 | 0.881163  | 0.893403 | x |
| x | O  | 116 | 0.586593 | 0.132981  | 0.885063 | x |
| x | O  | 117 | 0.989705 | 0.690138  | 0.874510 | x |
| x | O  | 118 | 0.984074 | 0.307118  | 0.878805 | x |
| x | O  | 119 | 0.904512 | 0.878847  | 0.799608 | x |
| x | O  | 120 | 0.912639 | 0.128904  | 0.789985 | x |
| x | O  | 121 | 0.737793 | 0.364730  | 0.508830 | x |
| x | O  | 122 | 0.939794 | 0.499589  | 0.859066 | x |
| x | O  | 123 | 0.833322 | 0.371977  | 0.894321 | x |
| x | O  | 124 | 0.834787 | 0.645412  | 0.879736 | x |
| x | O  | 125 | 0.732520 | 0.193577  | 0.869827 | x |
| x | O  | 126 | 0.731208 | 0.804246  | 0.879268 | x |
| x | O  | 127 | 0.641437 | 0.387409  | 0.802586 | x |
| x | O  | 128 | 0.652771 | 0.627557  | 0.786422 | x |
| x | Na | 1   | 0.132452 | 0.985688  | 0.074101 | x |
| x | Na | 2   | 0.384316 | 0.487702  | 0.070231 | x |
| x | Na | 3   | 0.365681 | 0.012303  | 0.429768 | x |
| x | Na | 4   | 0.617549 | 0.514316  | 0.425902 | x |
| x | Na | 5   | 0.132452 | 0.985686  | 0.574102 | x |



|   |    |    |          |          |          |   |
|---|----|----|----------|----------|----------|---|
| x | Na | 6  | 0.384318 | 0.487698 | 0.570233 | x |
| x | Na | 7  | 0.365683 | 0.012300 | 0.929770 | x |
| x | Na | 8  | 0.617549 | 0.514313 | 0.925902 | x |
| x | Al | 1  | 0.013242 | 0.174666 | 0.107868 | x |
| x | Al | 2  | 0.260074 | 0.671670 | 0.107829 | x |
| x | Al | 3  | 0.489925 | 0.828332 | 0.392171 | x |
| x | Al | 4  | 0.255684 | 0.323528 | 0.394948 | x |
| x | Al | 5  | 0.494316 | 0.176471 | 0.105052 | x |
| x | Al | 6  | 0.749962 | 0.677695 | 0.105900 | x |
| x | Al | 7  | 1.000038 | 0.822304 | 0.394099 | x |
| x | Al | 8  | 0.736758 | 0.325333 | 0.392132 | x |
| x | Al | 9  | 0.013242 | 0.174667 | 0.607868 | x |
| x | Al | 10 | 0.260074 | 0.671668 | 0.607829 | x |
| x | Al | 11 | 0.489926 | 0.828331 | 0.892171 | x |
| x | Al | 12 | 0.255684 | 0.323529 | 0.894948 | x |
| x | Al | 13 | 0.494316 | 0.176471 | 0.605052 | x |
| x | Al | 14 | 0.749962 | 0.677696 | 0.605900 | x |
| x | Al | 15 | 1.000038 | 0.822304 | 0.894099 | x |
| x | Al | 16 | 0.736758 | 0.325333 | 0.892132 | x |
| x | Si | 1  | 0.008755 | 0.821903 | 0.116245 | x |
| x | Si | 2  | 0.341659 | 0.112512 | 0.160819 | x |
| x | Si | 3  | 0.338922 | 0.884092 | 0.178912 | x |
| x | Si | 4  | 0.256742 | 0.324574 | 0.115410 | x |
| x | Si | 5  | 0.104289 | 0.614156 | 0.165193 | x |
| x | Si | 6  | 0.101053 | 0.383860 | 0.176507 | x |
| x | Si | 7  | 0.493258 | 0.175426 | 0.384590 | x |
| x | Si | 8  | 0.157305 | 0.885868 | 0.339992 | x |
| x | Si | 9  | 0.162755 | 0.118358 | 0.322806 | x |
| x | Si | 10 | 0.253071 | 0.678470 | 0.385481 | x |
| x | Si | 11 | 0.408341 | 0.387488 | 0.339180 | x |
| x | Si | 12 | 0.411078 | 0.615909 | 0.321088 | x |
| x | Si | 13 | 0.496929 | 0.821529 | 0.114519 | x |
| x | Si | 14 | 0.854758 | 0.115258 | 0.163503 | x |
| x | Si | 15 | 0.848484 | 0.881056 | 0.174897 | x |
| x | Si | 16 | 0.747831 | 0.318617 | 0.115777 | x |
| x | Si | 17 | 0.592696 | 0.614132 | 0.160009 | x |
| x | Si | 18 | 0.587244 | 0.381642 | 0.177194 | x |
| x | Si | 19 | 1.002168 | 0.181383 | 0.384223 | x |
| x | Si | 20 | 0.645710 | 0.885844 | 0.334807 | x |
| x | Si | 21 | 0.648947 | 0.116140 | 0.323493 | x |
| x | Si | 22 | 0.741246 | 0.678097 | 0.383755 | x |
| x | Si | 23 | 0.895242 | 0.384742 | 0.336496 | x |
| x | Si | 24 | 0.901517 | 0.618944 | 0.325102 | x |
| x | Si | 25 | 0.008754 | 0.821904 | 0.616245 | x |
| x | Si | 26 | 0.341659 | 0.112512 | 0.660820 | x |
| x | Si | 27 | 0.338922 | 0.884092 | 0.678912 | x |
| x | Si | 28 | 0.256742 | 0.324574 | 0.615410 | x |
| x | Si | 29 | 0.104289 | 0.614157 | 0.665193 | x |
| x | Si | 30 | 0.101053 | 0.383861 | 0.676507 | x |
| x | Si | 31 | 0.493258 | 0.175426 | 0.884590 | x |
| x | Si | 32 | 0.157304 | 0.885868 | 0.839990 | x |
| x | Si | 33 | 0.162756 | 0.118358 | 0.822806 | x |
| x | Si | 34 | 0.253070 | 0.678471 | 0.885481 | x |
| x | Si | 35 | 0.408341 | 0.387488 | 0.839181 | x |
| x | Si | 36 | 0.411078 | 0.615908 | 0.821088 | x |
| x | Si | 37 | 0.496930 | 0.821529 | 0.614519 | x |
| x | Si | 38 | 0.854758 | 0.115258 | 0.663503 | x |
| x | Si | 39 | 0.848483 | 0.881056 | 0.674898 | x |
| x | Si | 40 | 0.747832 | 0.318617 | 0.615777 | x |
| x | Si | 41 | 0.592696 | 0.614132 | 0.660009 | x |



Ab25Or75

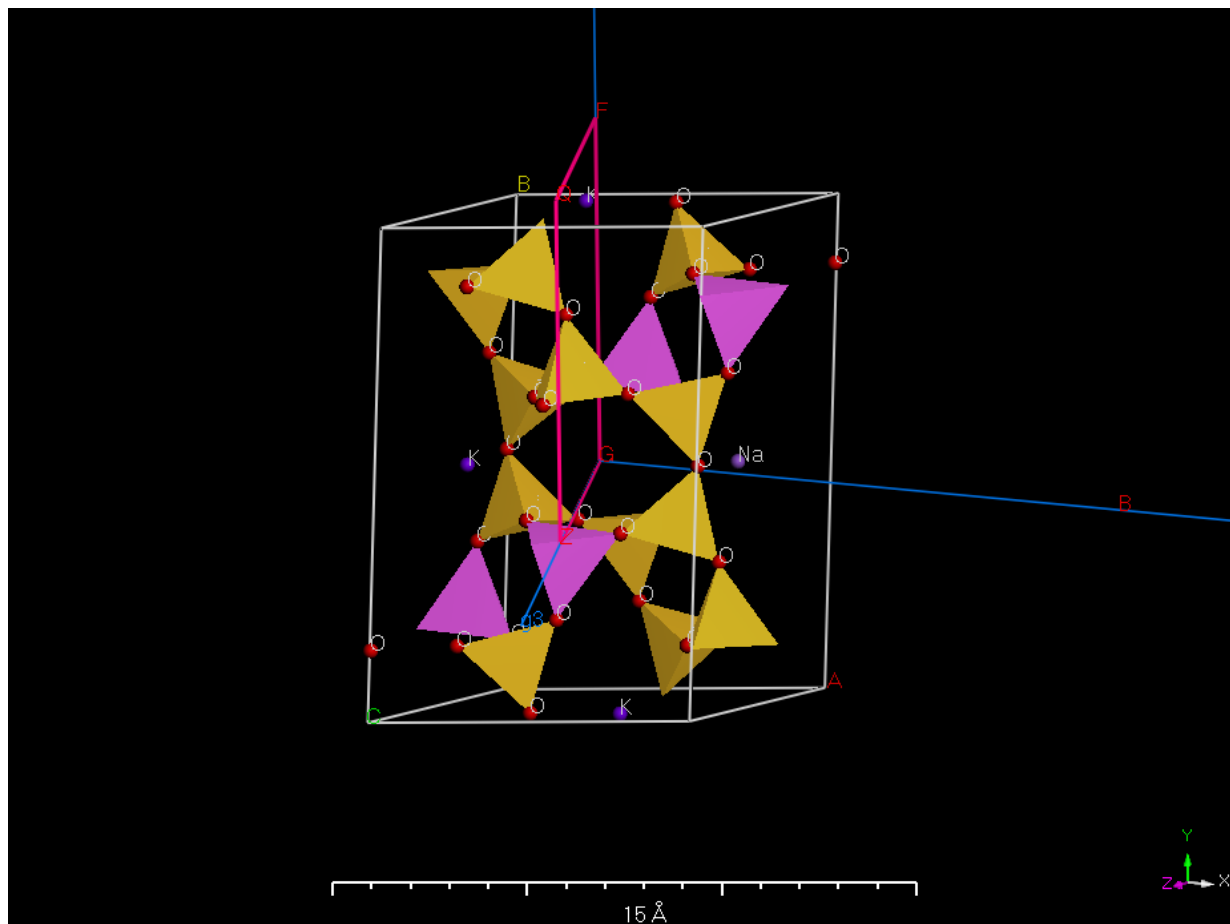

There are no symmetry operations specified or generated for this cell

|                       |           |             |            |
|-----------------------|-----------|-------------|------------|
| Lattice parameters(A) |           | Cell Angles |            |
| a =                   | 8.282419  | alpha =     | 91.631586  |
| b =                   | 12.801427 | beta =      | 115.982137 |
| c =                   | 7.116972  | gamma =     | 87.773390  |

Current cell volume = 677.756569 A\*\*3

BFGS: Final Enthalpy = -1.88869974E+004 eV

| x | Element | Atom Number | Fractional coordinates of atoms |          |          | x |
|---|---------|-------------|---------------------------------|----------|----------|---|
| x |         |             | u                               | v        | w        | x |
| x | O       | 1           | -0.002374                       | 0.144800 | 0.988387 | x |
| x | O       | 2           | 0.615400                        | 1.001811 | 0.286329 | x |
| x | O       | 3           | 0.816916                        | 0.137376 | 0.219879 | x |
| x | O       | 4           | 0.829275                        | 0.862452 | 0.238017 | x |
| x | O       | 5           | 0.016871                        | 0.316828 | 0.263150 | x |
| x | O       | 6           | 0.032868                        | 0.697680 | 0.250196 | x |
| x | O       | 7           | 0.192276                        | 0.126230 | 0.403912 | x |
| x | O       | 8           | 0.185208                        | 0.874609 | 0.409623 | x |
| x | O       | 9           | 0.508347                        | 0.638563 | 0.978519 | x |
| x | O       | 10          | 0.110641                        | 0.504466 | 0.287313 | x |
| x | O       | 11          | 0.328423                        | 0.629924 | 0.217228 | x |
| x | O       | 12          | 0.315998                        | 0.358100 | 0.235355 | x |
| x | O       | 13          | 0.530054                        | 0.808119 | 0.251854 | x |



Or100, Low microcline

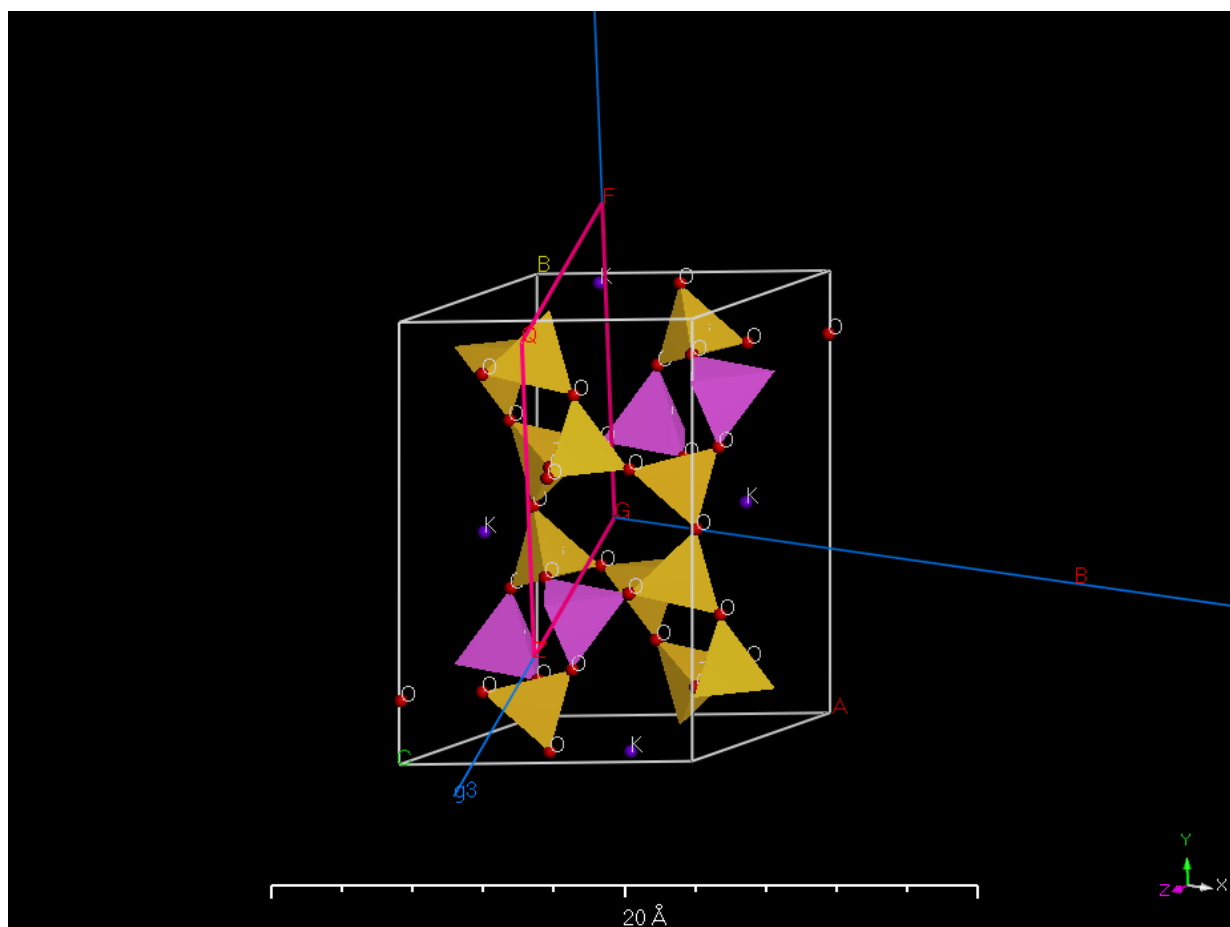

Number of symmetry operations = 4  
 Point group of crystal = 2: Ci, -1, -1

| Lattice parameters(A) |           | Cell Angles |            |
|-----------------------|-----------|-------------|------------|
| a =                   | 8.368703  | alpha =     | 90.575916  |
| b =                   | 12.821519 | beta =      | 116.068261 |
| c =                   | 7.122902  | gamma =     | 87.707884  |

Current cell volume = 685.960642 A\*\*3

BFGS: Final Enthalpy = -1.85175282E+004 eV

| x | Element | Atom   | Fractional coordinates of atoms |          |          | x |
|---|---------|--------|---------------------------------|----------|----------|---|
| x |         | Number | u                               | v        | w        | x |
| x | O       | 1      | -0.000050                       | 0.142413 | 0.987862 | x |
| x | O       | 2      | 0.621312                        | 1.005512 | 0.285715 | x |
| x | O       | 3      | 0.820102                        | 0.142867 | 0.219996 | x |
| x | O       | 4      | 0.826374                        | 0.863437 | 0.233680 | x |
| x | O       | 5      | 0.027457                        | 0.316582 | 0.248750 | x |
| x | O       | 6      | 0.031398                        | 0.697776 | 0.267726 | x |
| x | O       | 7      | 0.191762                        | 0.123899 | 0.404907 | x |
| x | O       | 8      | 0.179389                        | 0.875934 | 0.409648 | x |
| x | O       | 9      | 0.499950                        | 0.642413 | 0.987862 | x |
| x | O       | 10     | 1.121312                        | 1.505512 | 0.285715 | x |
| x | O       | 11     | 1.320102                        | 0.642867 | 0.219996 | x |
| x | O       | 12     | 1.326374                        | 1.363437 | 0.233680 | x |
| x | O       | 13     | 0.527457                        | 0.816582 | 0.248750 | x |



Excess volumes of mixing ( $V^{\text{exc}}$ ) plotted against composition ( $X_{\text{Or}}$ ):

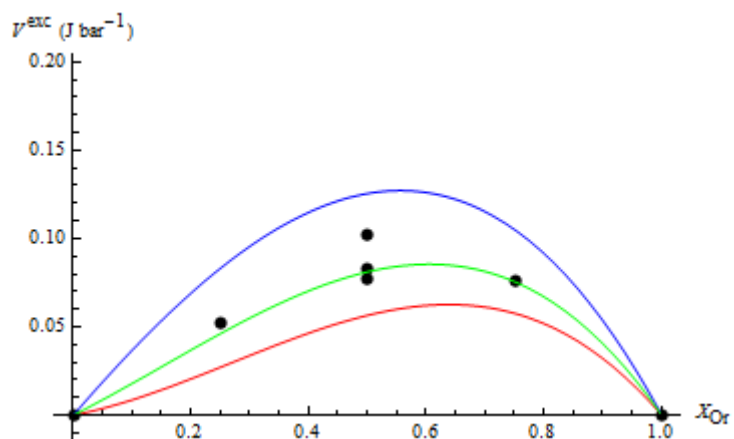

*Black symbols:* DFT data from this study.

*Curves:* Margules fit through excess volumes derived from X-ray diffraction studies of Kroll et al. 1986 (red), Hovis and Peckins 1978 (green), and Hovis 1988 (blue).
